# Supplementary material
Source: publisher figshare collection journal article supplement (https://aacr.figshare.com/articles/dataset/_/23183900)
Supplement: Supplementary file 1 [file 40885016]

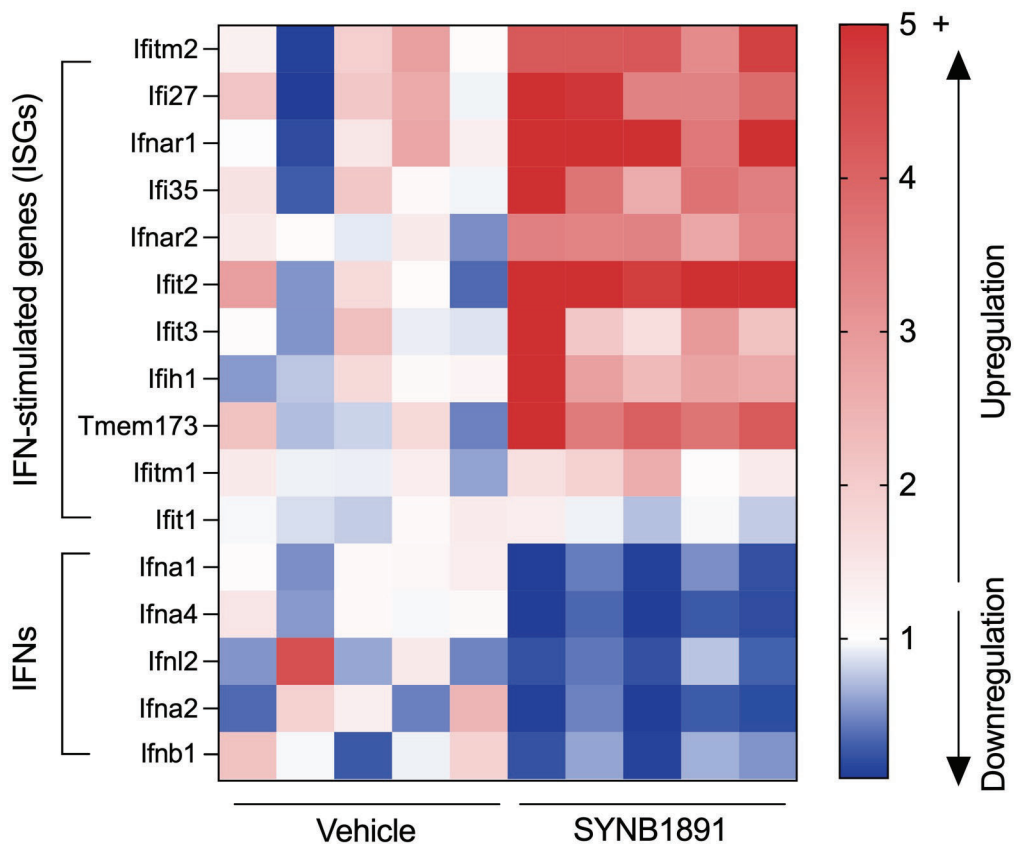

Supplemental Figure 4. SYNB1891 increases INF-stimulated gene expression in mouse tumors. Murine B16 tumor gene expression changes in INF and INF-stimulated genes 6d after SYNB1891 treatment. Gene expression was assessed by Nanostring in tumors collected pre-dose and on day 6 after dosing with SYNB1891 ( $2 \times 10^9$  live cells) or vehicle. Heat maps show the fold change in each gene relative to baseline for each animal ( $n=5$  per group).
